# Supplementary material for: Development and Validation of a Gene-Targeted dCAPS Marker for Marker-Assisted Selection of Low-Alkaloid Content in Seeds of Narrow-Leafed Lupin (Lupinus angustifolius L.)
Source: MDPI journal article supplement (doi:10.3390/genes10060428), 2019-06-04
Supplement: s1 [file s1]

Table S2. Primer sequences and PCR reaction conditions for the amplification of *RAP2-7*.

| Sequence          | Primer name      | Primer sequence                 | Product lenght | Tm | Elongation time | Mg     |
|-------------------|------------------|---------------------------------|----------------|----|-----------------|--------|
| RAP2-7 transcript | RAP_Lang_F1      | TCAATCCAAGTCCTTTTGTCC           | 610 bp         | 55 | 45 s            | 2 µM   |
|                   | RAP_Lang_R1      | CAGGTTCAACCATTTCAGTTTTT         |                |    |                 |        |
|                   | RAP_Lang_F2      | AGAGTTTCTGATATGAACAAGAG         | 2076 bp        | 50 | 60 s            | 2 µM   |
|                   | RAP_Lang_R2      | TAGGCTCAAATCAAGATTATGAC         |                |    |                 |        |
|                   | RAP_Lang_F3      | TGTTAGTAGTTTTATTTTAGGTGA        | 1387 bp        | 55 | 60 s            | 2 µM   |
|                   | RAP_Lang_R3      | GTACGATTTTCATATAAAACATGAC       |                |    |                 |        |
| putative promoter | RAP_Lang_F4      | GAGAAGAGAAATAGTTGGATG           | 561 bp         | 55 | 60 s            | 2 µM   |
|                   | RAP_Lang_R4      | CAGAAAAAGAGAAGAATAGAAAC         |                |    |                 |        |
|                   | RAP_Lang_F5      | TTACTAAACGGTTCATAGACT           | 510 bp         | 55 | 60 s            | 2 µM   |
|                   | RAP_Lang_R5      | CATCAATCCAAGATATTCACT           |                |    |                 |        |
|                   | RAP_Lang_F6      | TTGGCACTCTAACGCAAC              | 676 bp         | 53 | 60 s            | 2,5 µM |
|                   | RAP_Lang_R6      | ATGTTCTATTTCTTTTGATTTTC         |                |    |                 |        |
| Iuc_RAP2-7 marker | RAP_dCAPs_F      | TCGGAACCTATTTAAGTGGCTG          | 258 pz         | 59 | 30 s            | 2 µM   |
|                   | RAP_dCAPs_TaqI_R | AAATCAAAGTTTATATCTGCATCAACTCCTC |                |    |                 |        |

Table S3. Primer/probe sequences and reaction conditions for the quantitative PCR analyses of selected quinolizidine alkaloid genes.

| Target gene   | Locus name in NLL genome /NCBI GeneID | PCR thermal profile (°C) | qPCR reaction mixture <sup>b</sup> |             |                                      | Primer sequence <sup>a</sup> | Probe sequence <sup>a</sup>     | Product length (bp) | Efficiency |
|---------------|---------------------------------------|--------------------------|------------------------------------|-------------|--------------------------------------|------------------------------|---------------------------------|---------------------|------------|
|               |                                       |                          | Primer pairs (μM)                  | Probes (μM) | Template cDNA (μl/reaction dilution) |                              |                                 |                     |            |
| <i>LaAT</i>   | TanjilG_21586 /LOC109328823           | 58                       | 0.5                                | 0.1         | 1 /1:10                              | F: CCACCTTCCAAAGCCTTATT      | TAACCTTCAGAGCTTCCATCTCCTCTC     | 146                 | 0.94       |
|               |                                       |                          |                                    |             |                                      | R: GTGTTGCCATGCCTAAGTTT      |                                 |                     |            |
| <i>LaCAO</i>  | TanjilG_00530 /LOC109328478           | 60                       | 0.5                                | 0.1         | 1 /1:10                              | F: TCCTAATCAAAATCCACGCATTG   | CCTACATGGGTTACGCAGAACCGATCT     | 105                 | 0.97       |
|               |                                       |                          |                                    |             |                                      | R: GTGACTCCAAATACATACCAAAG   |                                 |                     |            |
| <i>LDC</i>    | TanjilG_09726 /LOC109327937           | 58                       | 0.5                                | 0.1         | 1 /1:10                              | F: ATTGGTGGCGGTTTCACTTG      | TGGAAAAGAGGAAGGTGTTGTGGTAATTGGA | 140                 | 0.98       |
|               |                                       |                          |                                    |             |                                      | R: AAAGGTGACTCAGCAAAATAACG   |                                 |                     |            |
| <i>RAP2-7</i> | TanjilG_07628 /LOC109342033           | 58                       | 0.8                                | 0.1         | 1 /1:10                              | F: TATCACATTCTGGGGCATCC      | TCCTGTGGAGGAAGATTCCTCAAACAA     | 135                 | 0.95       |
|               |                                       |                          |                                    |             |                                      | R: CCACTCCCTTGTTCTTTCA       |                                 |                     |            |

<sup>a</sup> Kroc et al. (2019)

<sup>b</sup> total reaction volume 10 (μl)
