# Supplementary figures and images for: Development and Validation of a Gene-Targeted dCAPS Marker for Marker-Assisted Selection of Low-Alkaloid Content in Seeds of Narrow-Leafed Lupin (Lupinus angustifolius L.)
Source: MDPI journal article supplement (doi:10.3390/genes10060428), 2019-06-04

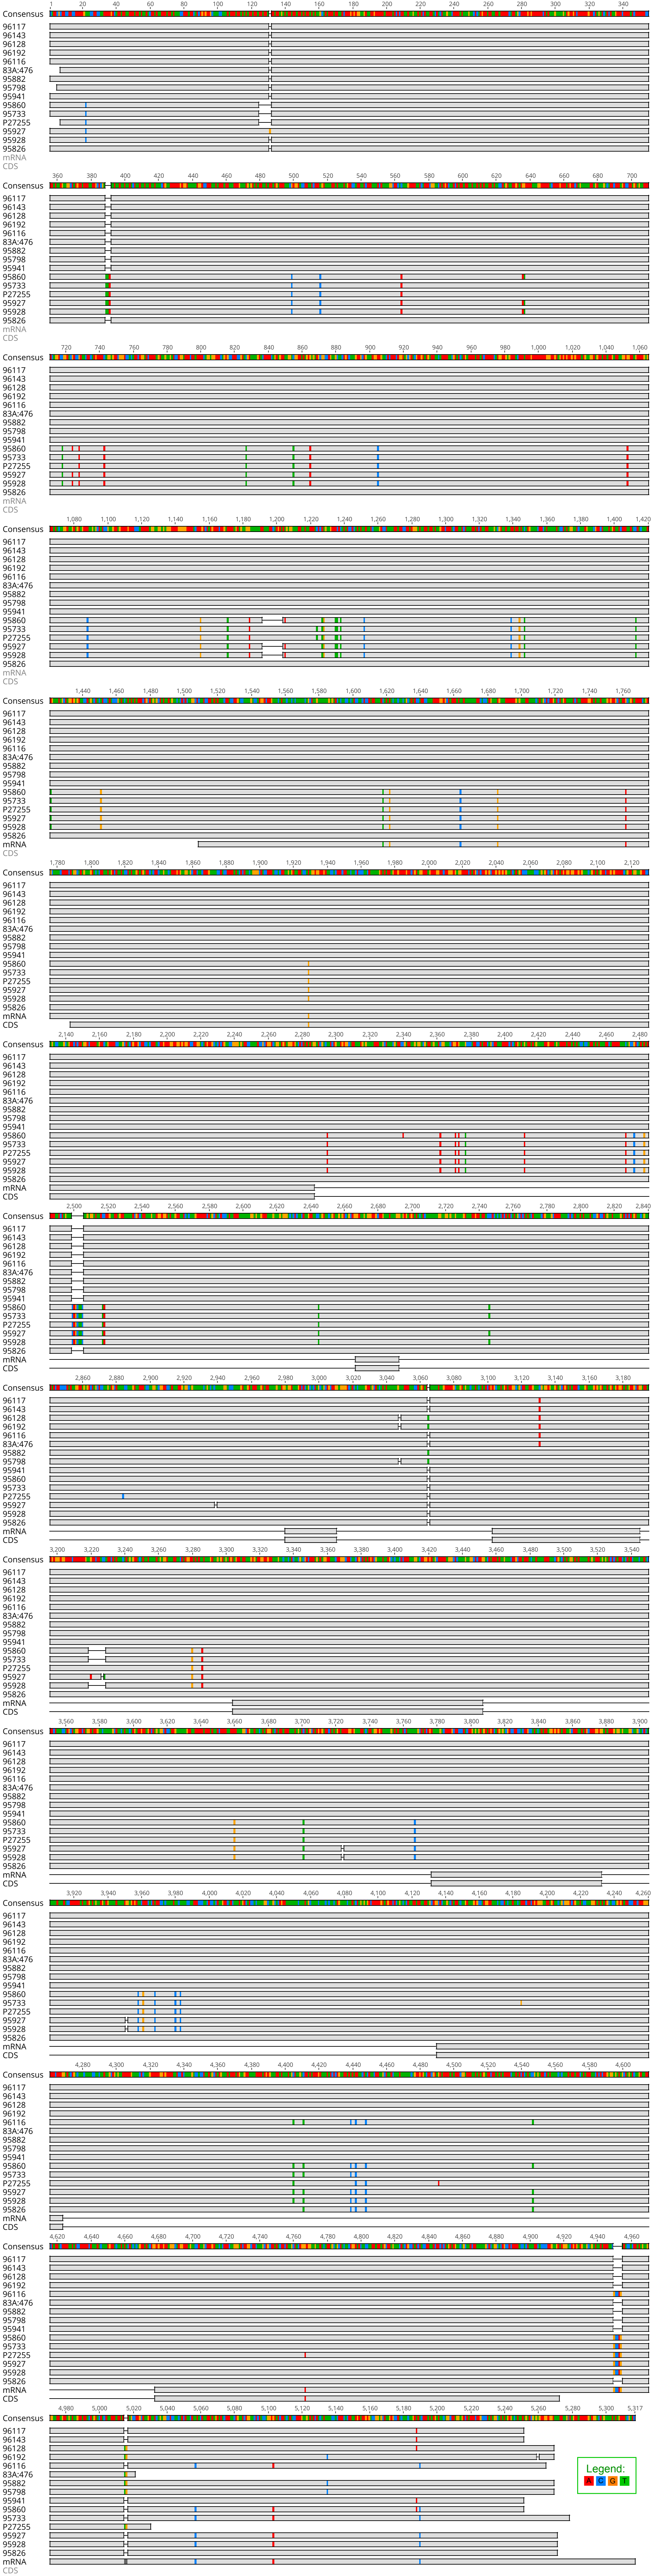

Supplement: s1 [file s1]
